# Supplementary material for: Molecular Insights into Defense Responses of Vietnamese Maize Varieties to Fusarium verticillioides Isolates
Source: MDPI journal article supplement (doi:10.3390/jof7090724), 2021-09-04
Supplement: s1 [file s1]

**Table S1.** A list of 12 *Fusarium verticillioides* isolates derived from Vietnamese central highlands' maize fields between 2017 and 2019.

| Isolate | Host         | Location | Accession number                |             |             |
|---------|--------------|----------|---------------------------------|-------------|-------------|
|         |              |          | <i>TEF-1<math>\alpha</math></i> | <i>RBP1</i> | <i>RBP2</i> |
| F01-12  | Maize kernel | Dak Lak  | MZ559332                        | MZ615354    | MZ559290    |
| F02-11  | Maize kernel | Dak Lak  | MZ559333                        | MZ615355    | MZ559291    |
| F11-12  | Maize kernel | Dak Lak  | MZ359353                        | NA          | MZ559311    |
| F12-2   | Maize kernel | Dak Lak  | MZ559355                        | MZ615375    | MZ559313    |
| F17-1   | Maize kernel | Dak Lak  | MZ559361                        | MZ615381    | MZ559319    |
| F22-11  | Maize kernel | Dak Lak  | MZ559367                        | MZ615387    | MZ559325    |
| F04-11  | Maize kernel | Dak Nong | MZ559341                        | MZ615362    | MZ559299    |
| F06-12  | Maize kernel | Dak Nong | MZ559345                        | MZ615366    | MZ559303    |
| F14-1   | Maize kernel | Dak Nong | MZ559357                        | MZ615377    | MZ559315    |
| F14-22  | Maize kernel | Dak Nong | MZ559359                        | MZ615379    | MZ559317    |
| F26-2   | Maize kernel | Dak Nong | MZ559370                        | MZ615390    | MZ559328    |
| F26-31  | Maize kernel | Dak Nong | MZ559371                        | MZ615391    | MZ559329    |

Translation elongation factor 1 alpha gene (*TEF-1 $\alpha$* ), *RBP1* (RNA polymerase largest subunit), *RBP2* (RNA polymerase second largest subunit). NA: not applicable.

**Table S2.** Primers used for DNA sequencing. Adapted from O'Donnell et al. 2010 [37].

| Locus                                                                      | Primers | Sequence (5'-3')       |
|----------------------------------------------------------------------------|---------|------------------------|
| <i>EF1-<math>\alpha</math></i> (Translation elongation factor 1 $\alpha$ ) | EF1     | ATGGGTAAGGARGACAAGAC   |
|                                                                            | EF2     | GGARGTACCAGTSATCATG    |
| <i>RBP1</i> (RNA polymerase largest subunit)                               | F7      | CRACACAGAAGAGTTTGAAGG  |
|                                                                            | R9      | TCARGCCCATGCGAGAGTTGTC |
| <i>RBP2</i> (RNA polymerase second largest subunit)                        | 5f2     | GGGGWGAYCAGAAGAAGGC    |
|                                                                            | 7cr     | CCCATRGCTTGYTTRCCCAT   |

**Table S3.** Primers of target genes and reference genes used in this study.

| Gene                           | Forward primer           | Reverse primer         | Reference                 |
|--------------------------------|--------------------------|------------------------|---------------------------|
| <i>PAL</i>                     | AAGAAGGTGAACGAGCTGGA     | GTTGTCGTTACGGAGTTGA    | Tzin et al. 2017 [38]     |
| <i>LOX3</i>                    | CGTGTAACGGGAAGAGAGC      | CCAATGATTGCAACAAGCAC   |                           |
| <i>LOX10</i>                   | GACATCCTCTCGTCGCACTC     | ATGAACCCCTCGATCTCCTT   | Ding et al. 2015 [32]     |
| <i>BX6</i>                     | GAGTGCATGCAGAACCTGAA     | GCAGGAGGATGGTGAAGAAG   |                           |
| <i>PR10</i>                    | GTCATGCCGTTTCAGCTTCAT    | TGTTCTTGCACTCGACTTG    |                           |
| <i>AOS</i>                     | ACCTGTTACGGGCACCTAC      | CGAGGAGCGAGGAGAAGTTG   |                           |
| <i>BX8</i>                     | GATACCTGCCGGTGAGAGAG     | GGGAACGTGTGGAAGATGAG   |                           |
| <i>BX9</i>                     | GCAACATGAGGTACGTGTGC     | GCAGCGATCTGAATTCCTT    |                           |
| <i>PR2</i>                     | GCGCAGACCTACAACCAGA      | GGAGAAATTGATGGGGTACG   | Lanubile et al. 2010 [39] |
| <i>PR3</i>                     | GGCTCTACGCCTACGTCAAC     | GATGGAGAGGAGCACCTTGA   |                           |
| <i>ABI</i>                     | GCGAGATCCTCGACTCCAAG     | GGGCTTGTTAACGGTGATG    | Ding et al. 2015 [32]     |
| <i>EF-1<math>\alpha</math></i> | TGGGCCTACTGGTCTTACTACTGA | ACATACCCACGCTTCAGATCCT |                           |
| <i><math>\beta</math>-TUB</i>  | CTACCTCACGGCATCTGCTATGT  | GTCACACACACTCGACTTCACG | Lin et al. 2014 [40]      |

Phenylalanine ammonia-lyase (putative) (*PAL*); Pathogenesis-related protein 10 (*PR10*); Lipoxigenase 3 (*LOX3*); Lipoxigenase 10 (*LOX10*); 2-oxoglutarate-dependent oxygenase (*BX6*); UDP-glucosyltransferase (*BX8/BX9*); Allene oxide synthase (*AOS*); 1,3- $\beta$ -glucanase (*PR2*); Chitinase (*PR3*); Homology to glycin-rich protein (*ABI*); Elongation factor 1 alpha (*EF-1 $\alpha$* ); Beta tubulin ( *$\beta$ -TUB*).

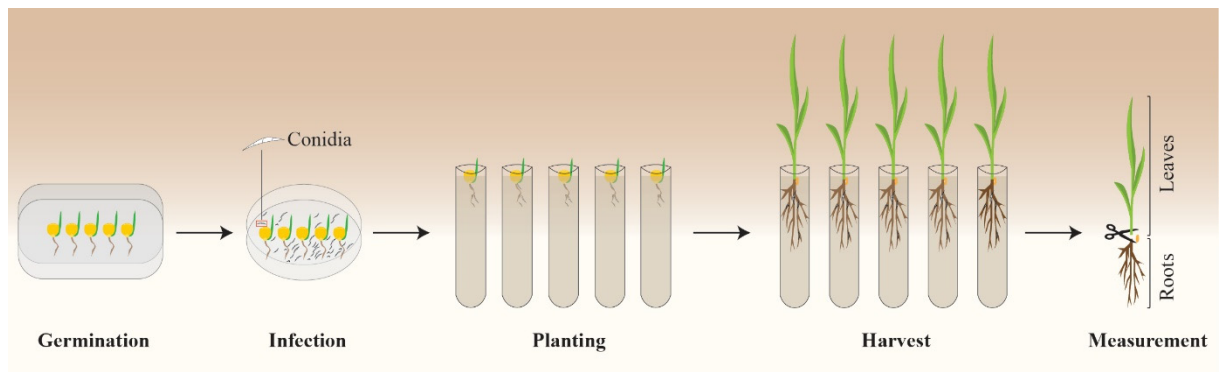

**Figure S1.** Working flow of the *in planta* assay
